# Supplementary material
Source: PubMed Central journal article supplement (PMC7047428)
Supplement: oc9b01247_si_001.pdf [file oc9b01247_si_001.pdf]

# Enhancing the Signalling of GPCRs via Orthosteric Ions

H.C. Stephen Chan<sup>†#</sup>, Yueming Xu<sup>†#</sup>, Liang Tan<sup>†#</sup>, Horst Vogel<sup>†§</sup>, Jianjun Cheng<sup>†\*</sup>,

Dong Wu<sup>†\*</sup>, Shuguang Yuan<sup>†\*</sup>

<sup>†</sup> Shenzhen Institutes of Advanced Technology, Chinese Academy of Sciences, Shenzhen 518055, China

<sup>#</sup> Human Institute, ShanghaiTech University, Shanghai 201210, China

<sup>§</sup> Institute of Chemical Sciences and Engineering, Ecole Polytechnique Fédérale de Lausanne (EPFL),  
Lausanne 1015, Switzerland

**Table-S1** Dopamine activation against D2R variants ( $EC_{50}$ , nM).

| <b>Dopamine</b>                    | <b>WT</b>      | <b>L94A</b> | <b>D114</b> | <b>I183A</b> | <b>I184A</b>  | <b>F389A</b> | <b>F390A</b> | <b>H393A</b>    |
|------------------------------------|----------------|-------------|-------------|--------------|---------------|--------------|--------------|-----------------|
| <b><math>\beta</math>-arrestin</b> | 970 $\pm$ 420  | 288 $\pm$ 2 | N/A         | N/A          | 274 $\pm$ 16  | 940 $\pm$ 24 | N/A          | 1002 $\pm$ 87   |
| <b>G protein</b>                   | 2.2 $\pm$ 0.15 | N/A         | N/A         | N/A          | 588 $\pm$ 324 | N/A          | N/A          | 39.8 $\pm$ 19.6 |

**Table-S2** Dopamine and MLS1547 derivatives against wild type D2R ( $EC_{50}$ , nM)

| Compounds | structure                                                                           | G protein<br>$EC_{50}$ (nM) | Arrestin<br>$EC_{50}$ (nM) | pKa*          | Calculated<br>relative Binding<br>energy (kcal/mol) |
|-----------|-------------------------------------------------------------------------------------|-----------------------------|----------------------------|---------------|-----------------------------------------------------|
| dopamine  | 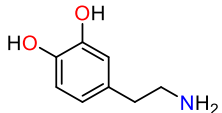   | $2.2 \pm 0.2$               | $970 \pm 420$              | -             | -                                                   |
| MLS1547   |    | $290 \pm 90$                | $250 \pm 60$               | $6.3 \pm 0.8$ | $-16.6 \pm 0.6$                                     |
| MLS-d1    |    | $18.6 \pm 3.1$              | $68.8 \pm 1.4$             | $4.2 \pm 0.4$ | $-20.4 \pm 0.8$                                     |
| MLS-d2    |   | $95 \pm 6$                  | $135 \pm 10$               | $6.4 \pm 0.7$ | $-18.1 \pm 0.5$                                     |
| MLS-d3    |  | inactive                    | inactive                   | $7.4 \pm 0.5$ | $-10.0 \pm 0.8$                                     |
| MLS-d4    |  | inactive                    | inactive                   | $3.4 \pm 0.9$ | $-9.6 \pm 0.7$                                      |
| MLS-d5    |  | inactive                    | inactive                   | $6.9 \pm 0.6$ | $-8.2 \pm 0.7$                                      |

\* QM calculation of pKa of the hydroxyl group in quinolin-8-ol ring.

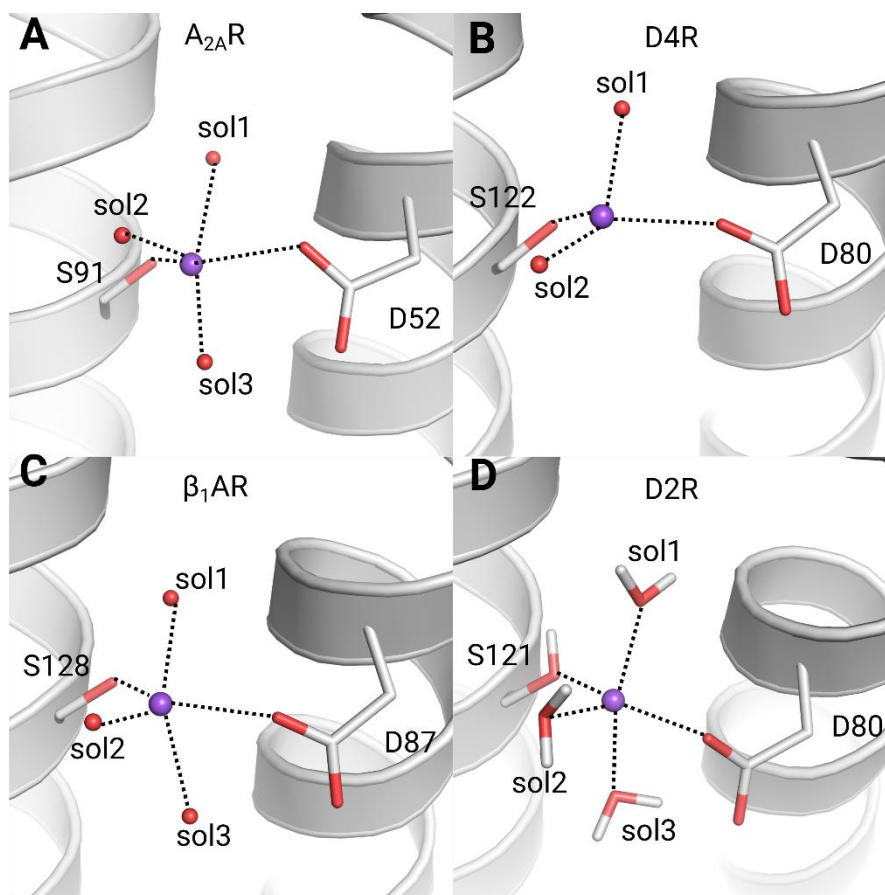

**Figure S1. The allosteric sodium ions observed in high resolution structures of GPCRs.** (a)  $A_{2A}R$  (pdb code: 5NM4), (b)  $D4R$  (pdb: 5WIV) and (c)  $\beta_1AR$  (pdb: 4BVN). (d) The final structure of apo- $D2R$  obtained from MD simulations.

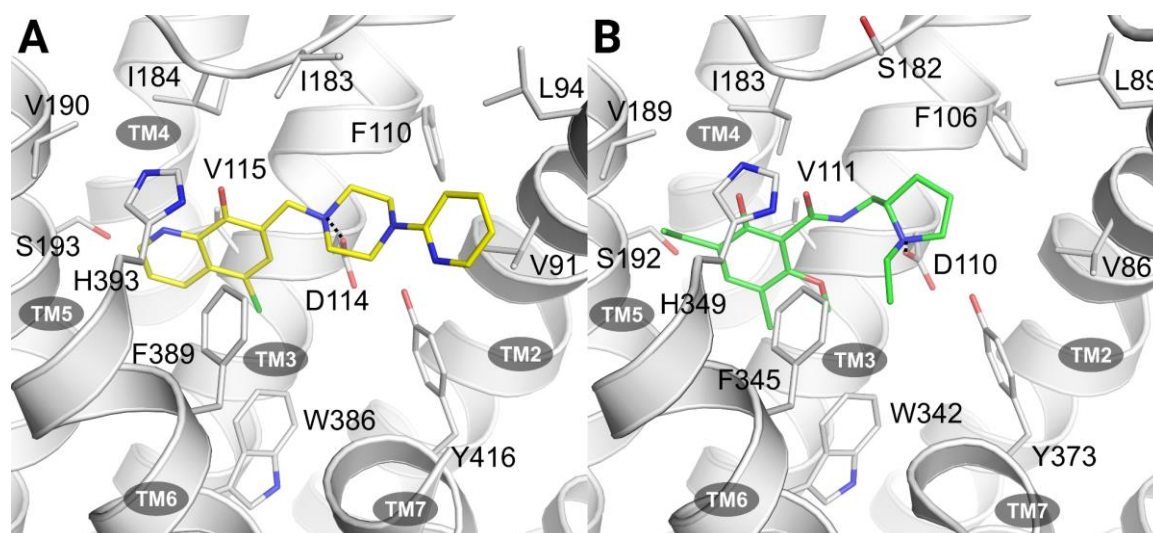

**Figure S2. Comparison of the binding modes.** (a) Docked agonist MLS1547 in D2R. (b) Crystal structure of D3R (pdb: 3PBL) showing the bound ligand ETQ. The binding modes are identical for both cases: (1) the left-hand side aromatic moiety in both ligands is located in an aromatic cage; (2) both ligands established an ionic interaction with residue D<sup>3.32</sup>.

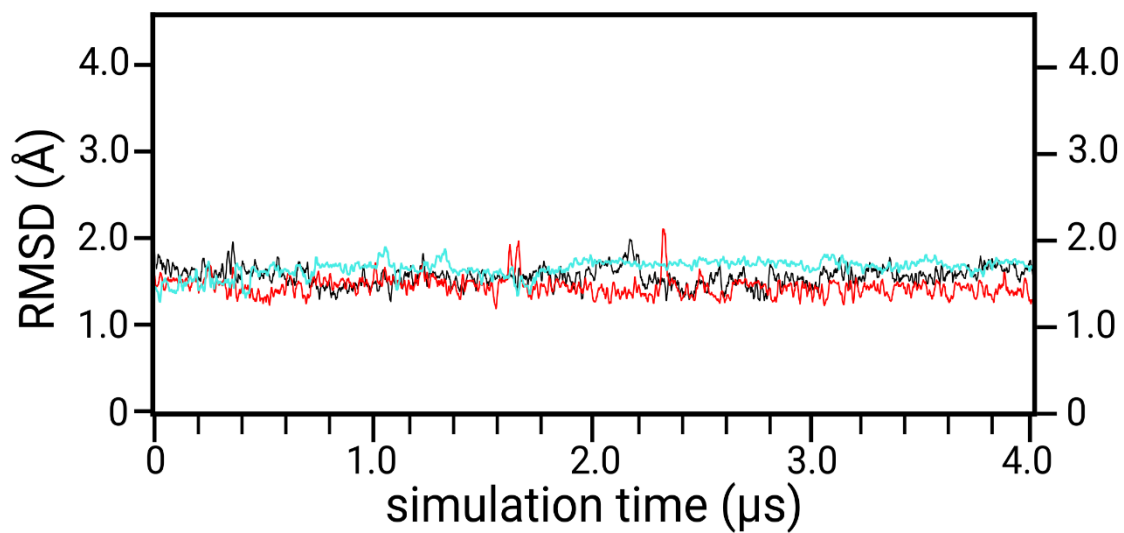

**Figure S3.** The root-mean-square deviation (RMSD) of MLS1547 during three different long-time scale MD simulations (in different colors). The fluctuation of MLS1547 was very small and the RMSD stabilized at about 1.5 – 1.7 Å.

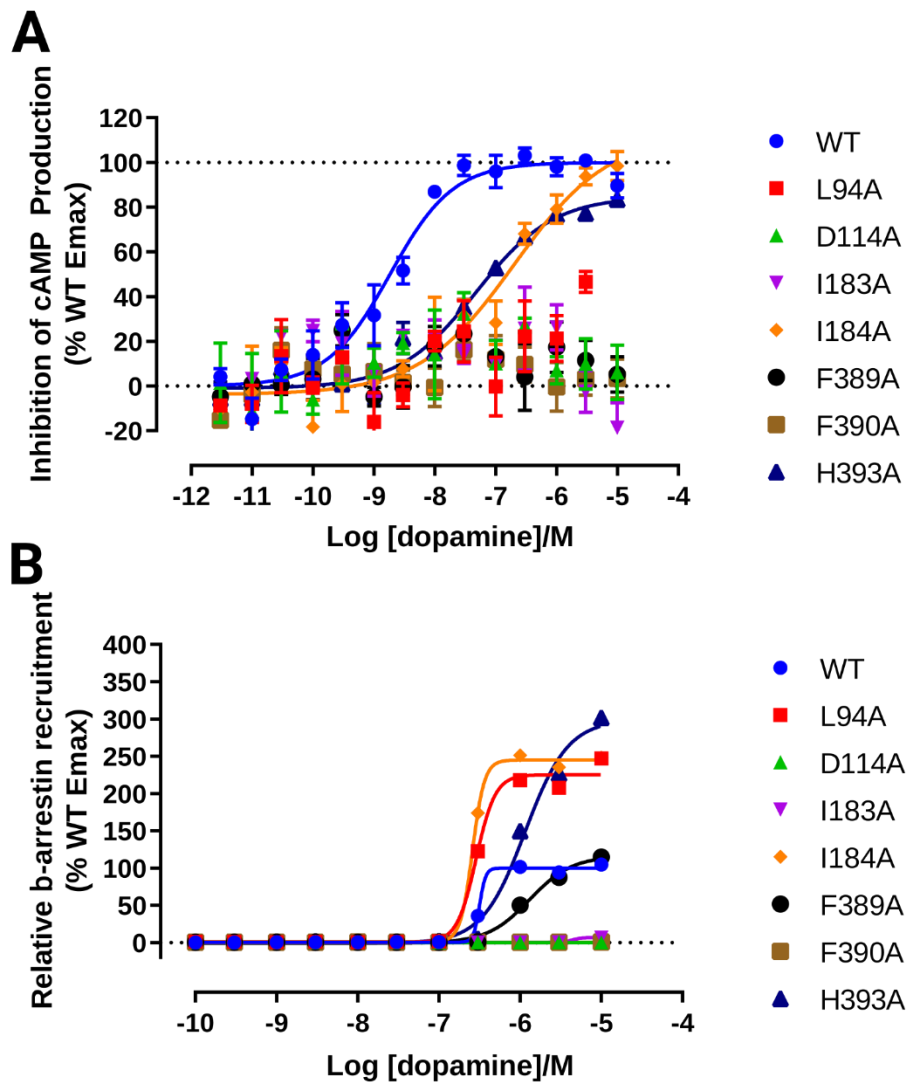

**Figure S4.** The dopamine activity against D2 receptor for (A) G protein activity and (B)  $\beta$ -arrestin activity. Mutation H393<sup>6.55</sup>A does not show significant influence for dopamine activity, implying that H393<sup>6.55</sup> does not play an essential role for the binding of dopamine.

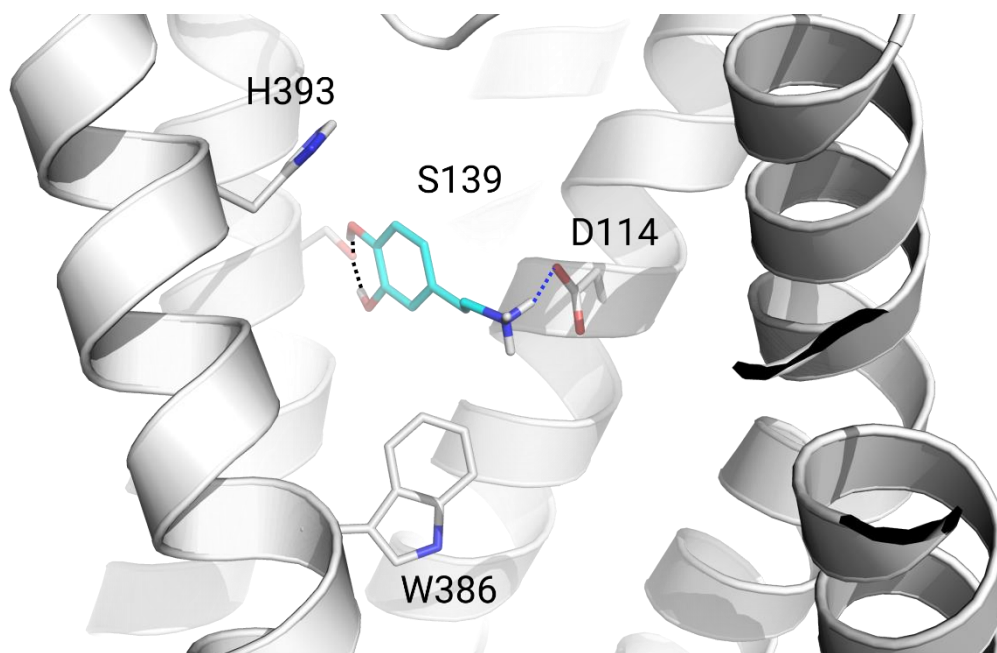

**Figure S5.** The binding mode of dopamine against D2R. Two hydrogen bonds (black dash) and one ionic interaction (red dash) were found between dopamine (cyan stick) and residues S139 and D114<sup>3,32</sup> (white stick) in D2R, respectively.



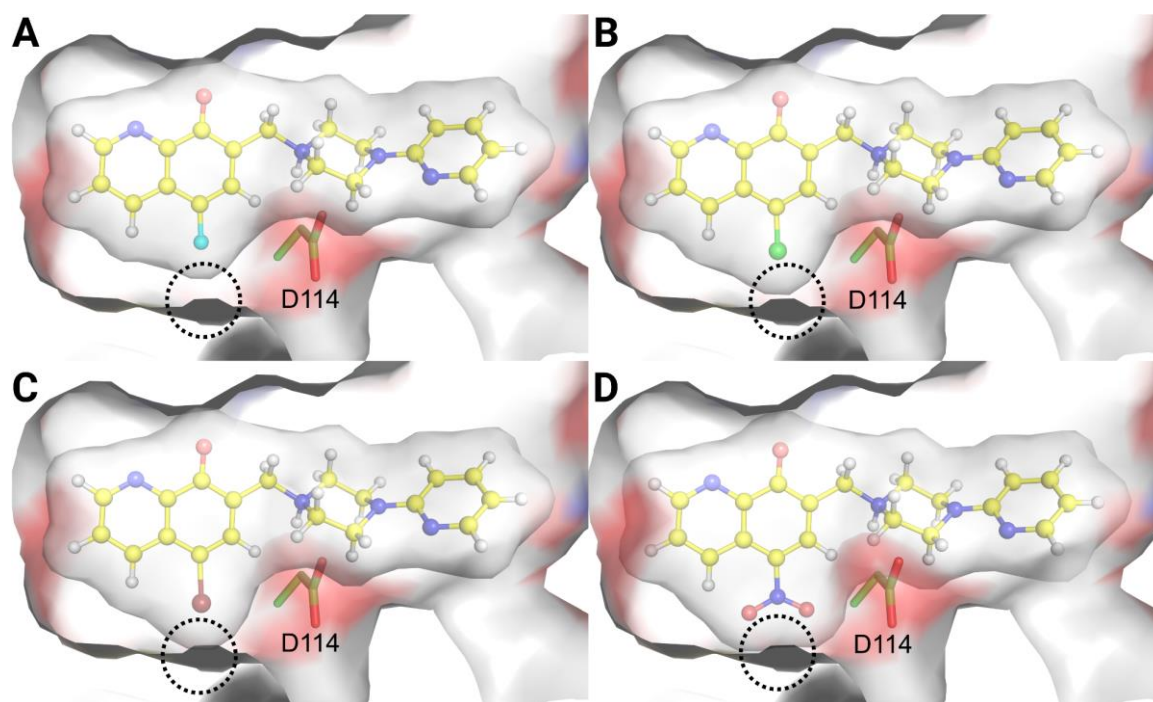

**Figure S6. The surface shape of MLS1547 and its chemically modified variants in the binding pocket.** (a) MLS-d1, (b) MLS1547, (c) MLS-d3 and (d) MLS-d4. Colored background surface indicates the binding pocket of D2R. White surface near compounds represent the molecular surface of each ligand. Yellow balls-and-sticks represent ligands. A fluorine in MLS-d1 fits very well into the binding pocket of D2R; it is located far away from the negatively charged D114<sup>3,32</sup>. The chlorine in MLS1547 experiences small steric repulsion in the binding pocket. Both bromine in MLS-d3 and the nitril group in MLS-d4 do not fit well into the binding pocket. Further, both are located too close to the negatively charged D114<sup>3,32</sup>.

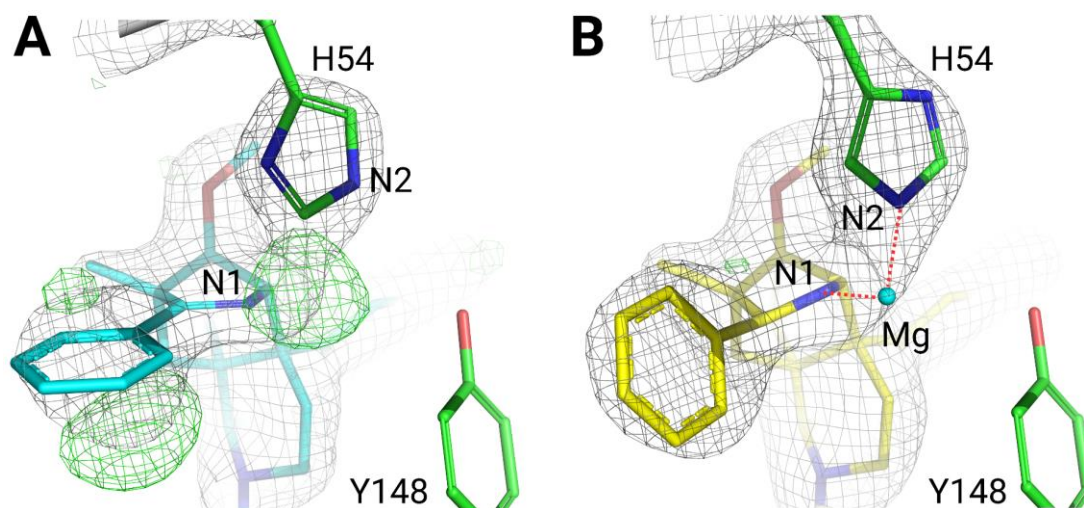

**Figure S7.** A Mg<sup>2+</sup> ion was found in the high-resolution crystal structure of μ-opioid receptor (μOR, PDB: 5C1M). (A) The “unidentified” electron density map in the orthosteric binding site μOR. Green grid: Fo-Fc positive electron density map at 3.2 σ level which indicated missing atoms in the corresponding region. Gray grid: 2Fo-Fc electron density map at 1.2 σ level. (B) A refined crystal structure of μOR which is completed by an Mg<sup>2+</sup> ion. Mg<sup>2+</sup> ion established a coordinating interaction with both μOR and agonist BU72.

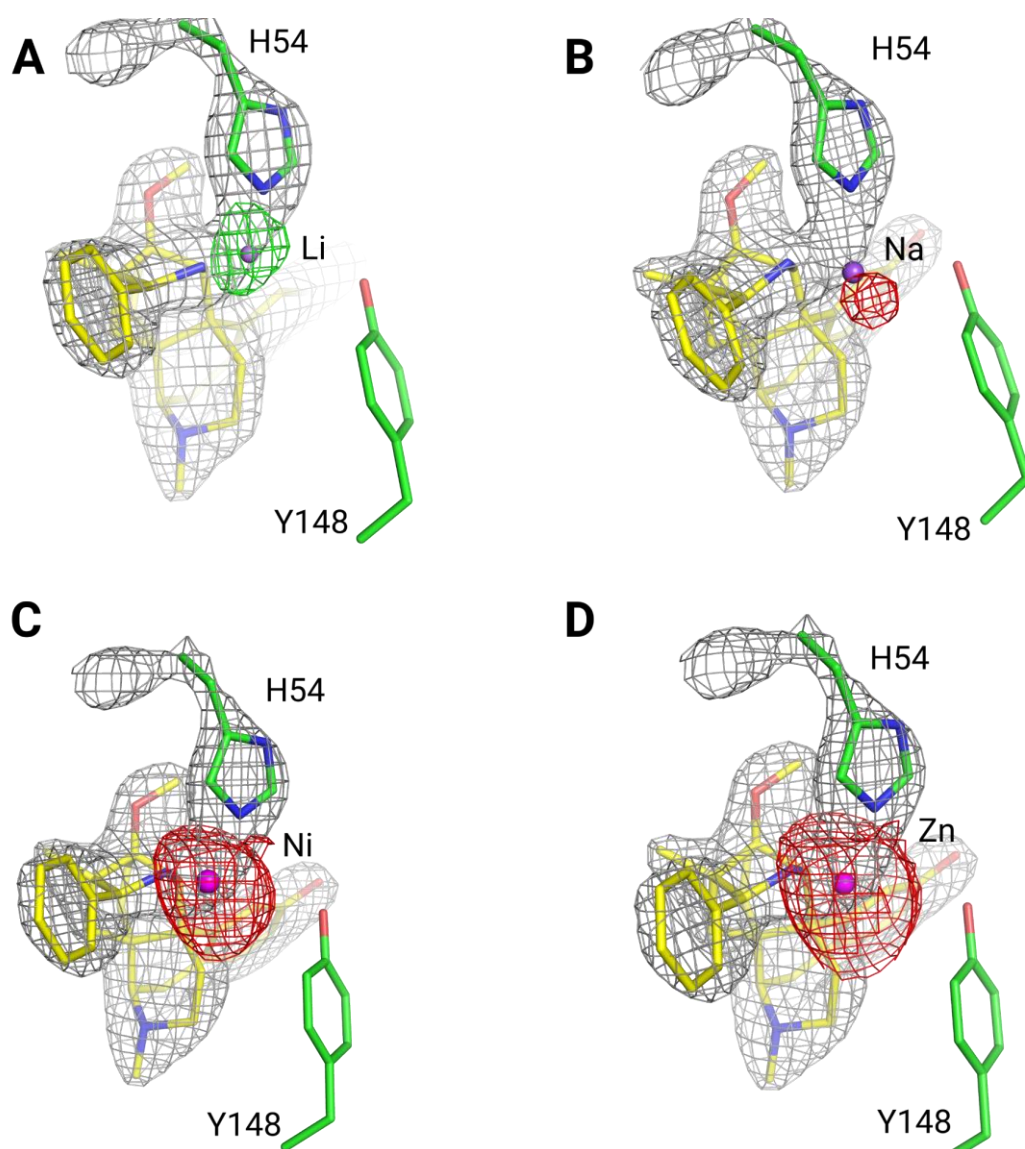

**Figure S8.** The refined electron density map of the “unidentified region” (pdb: 5C1M) for (A) Li<sup>+</sup> (B) Na<sup>+</sup> (C) Ni<sup>2+</sup> and (D) Zn<sup>2+</sup>. Green grid: Fo-Fc positive electron density map at 3.2  $\sigma$  level which indicated the missing atoms in the corresponding region. Gray grid: 2Fo-Fc electron density map at 1.2  $\sigma$  level. The Li ion is too small to fit the “unidentified region” and a large Fo-Fc positive map is still there after refinement. Na, Ni and Zn ions are too big to fit into the “unidentified region” as indicated by the Fo-Fc negative electron density map after refinement. The ions themselves were so big that they were even repelled out of the 2Fo-Fc map.

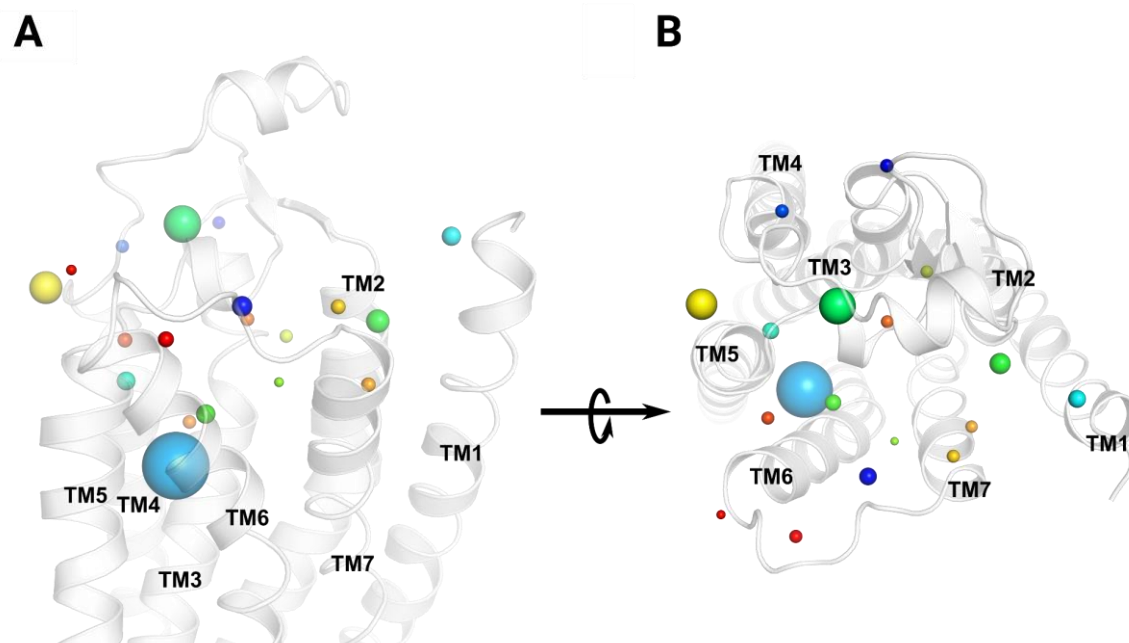

**Figure S9. His residues found in GPCR structures.** Different colors of spheres indicate different locations. The sizes of spheres are correlated to the frequency of their occurrence. The most His-rich region has been found in the vicinity of the orthosteric site next to TM5 and TM6 (dark cyan sphere).
